# Supplementary material for: Modelling of pathogen-host systems using deeper ORF annotations and transcriptomics to inform proteomics analyses
Source: PubMed Central journal article supplement (PMC7585943; doi:10.1016/j.csbj.2020.10.010), 2020-10-14

Supplementary Figure 1

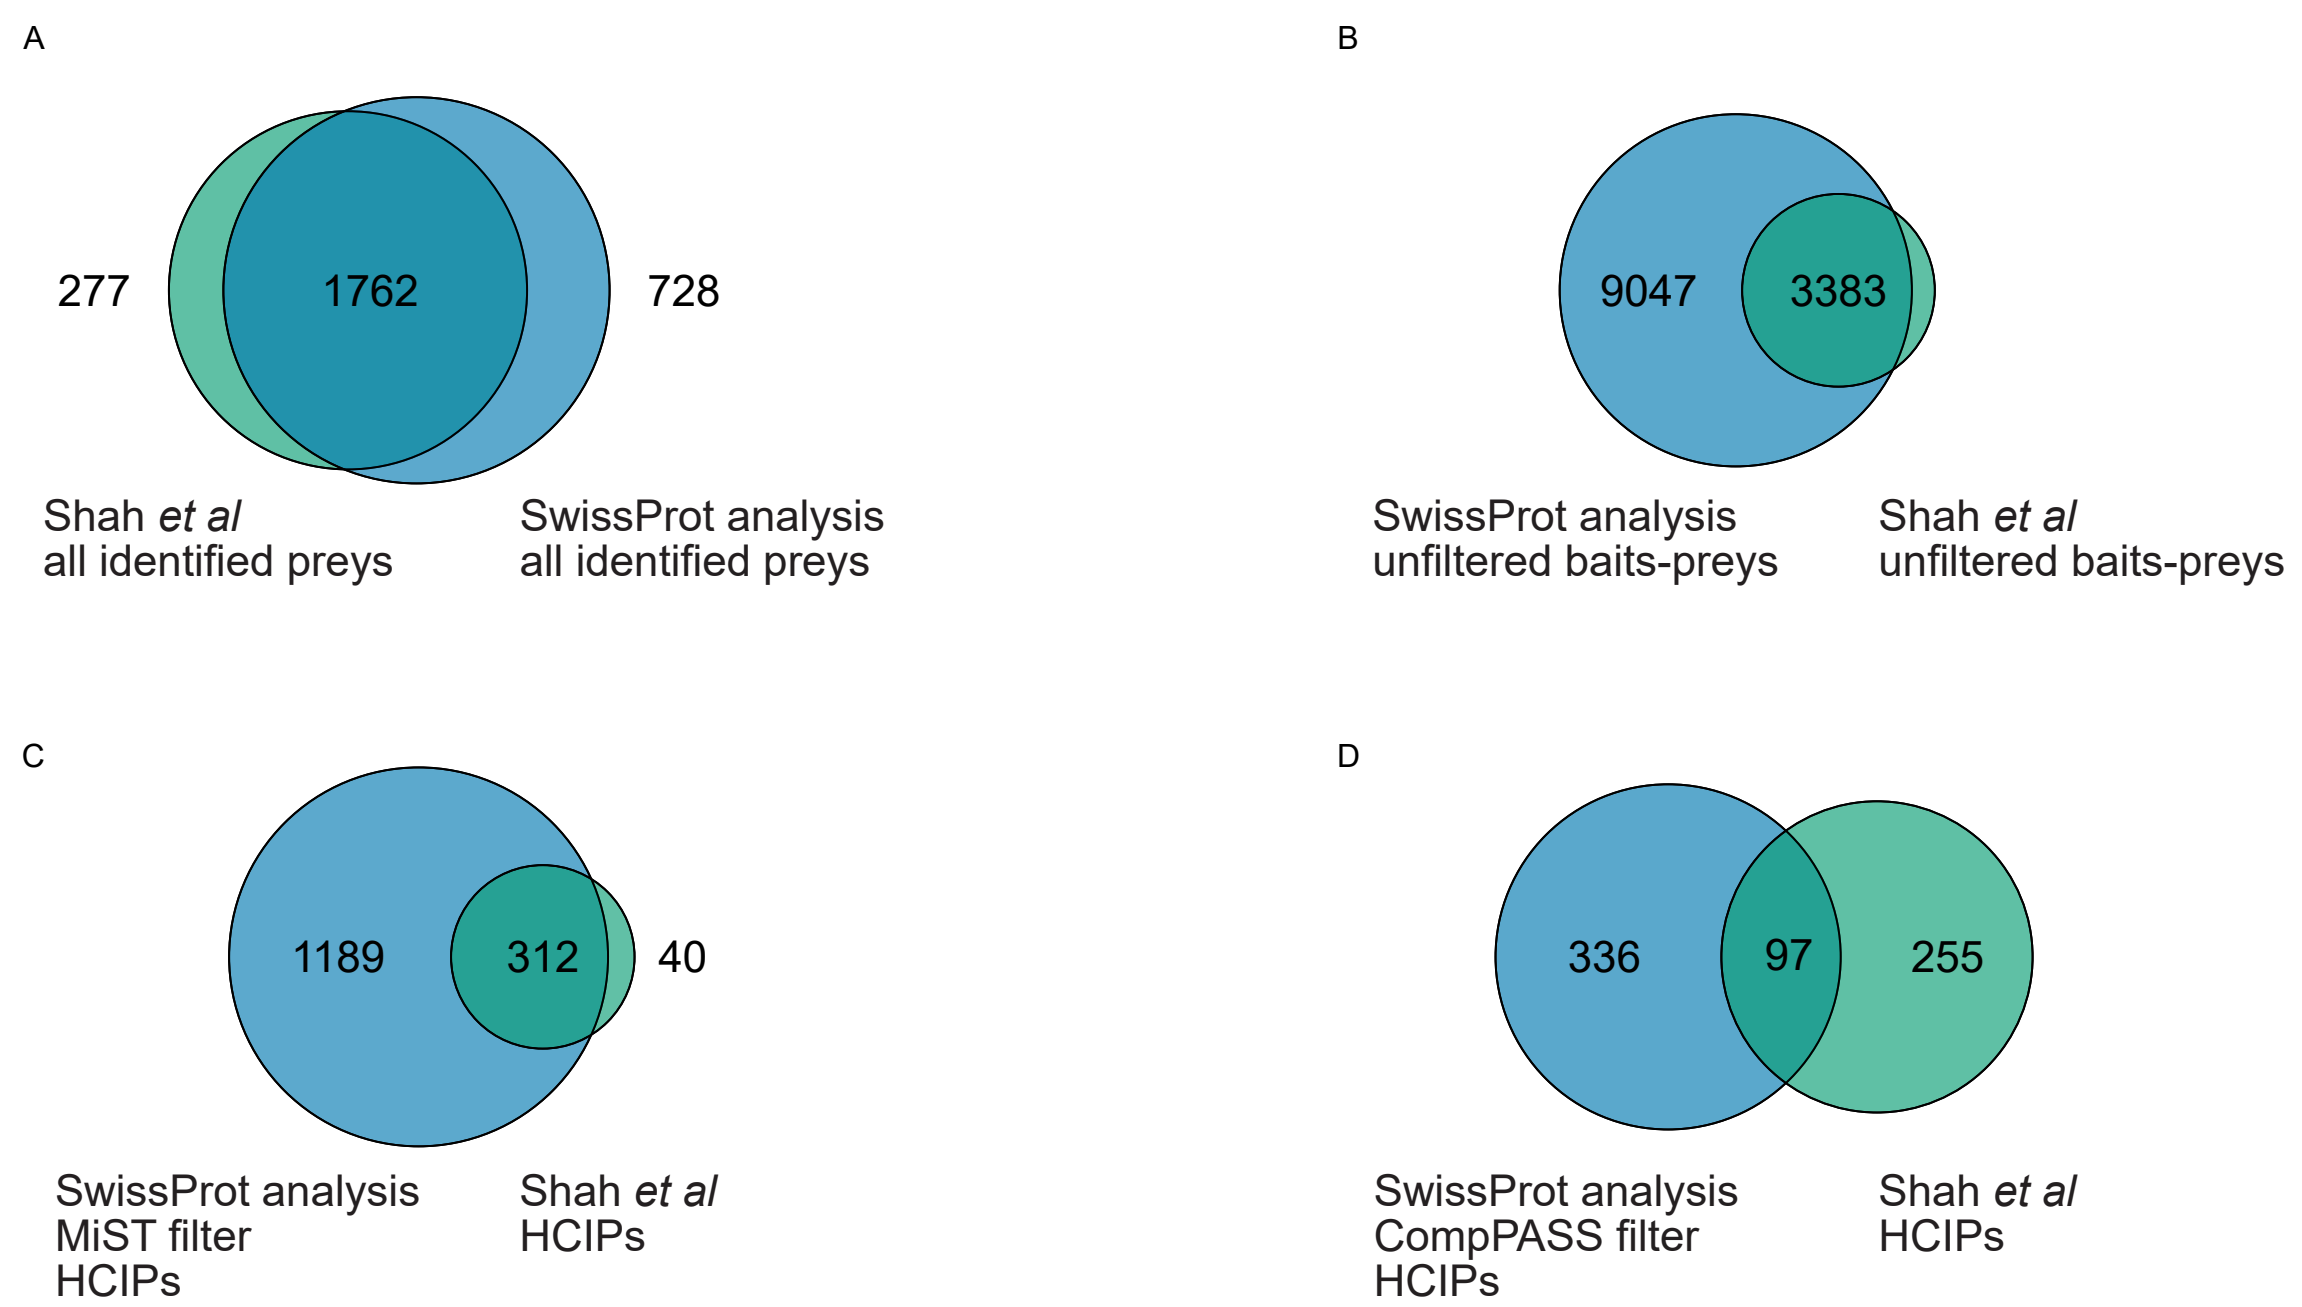

**F**

|                    | MiST | CompPASS | MiST $\cap$ CompPASS | Naive Bayes |
|--------------------|------|----------|----------------------|-------------|
| Threshold          | 0.75 | top 5%   | 0.75 / top 5%        | 0.45        |
| F score            | 0.34 | 0.25     | 0.31                 | 0.4         |
| Recall             | 0.89 | 0.28     | 0.28                 | 0.57        |
| Precision          | 0.21 | 0.22     | 0.35                 | 0.3         |
| Total HCIPs called | 1501 | 433      | 274                  | 665         |

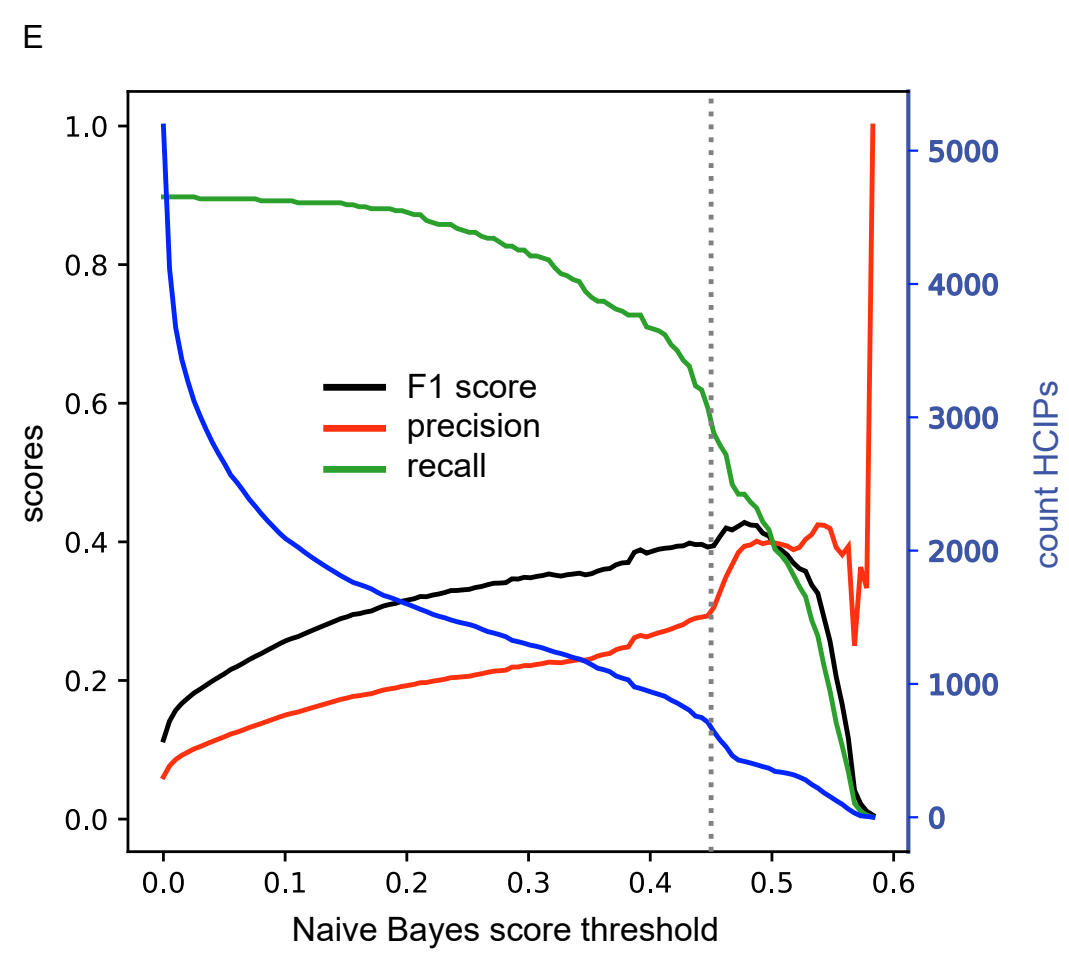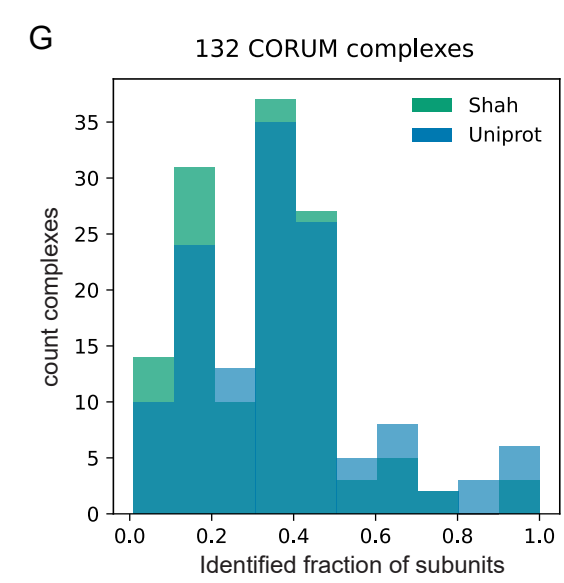

Supplement: mmc2.pdf [file mmc2.pdf]
