# Supplementary material for: Modelling of pathogen-host systems using deeper ORF annotations and transcriptomics to inform proteomics analyses
Source: PubMed Central journal article supplement (PMC7585943; doi:10.1016/j.csbj.2020.10.010), 2020-10-14

Figure 6

A

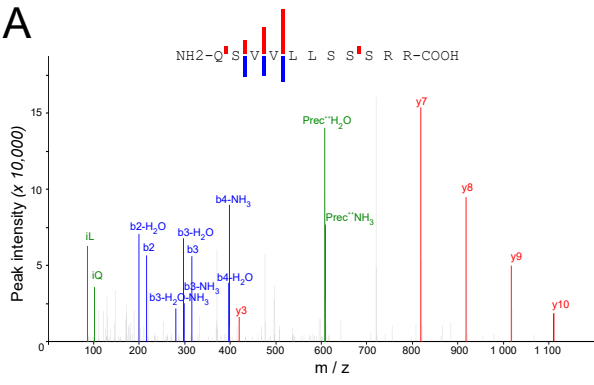

B

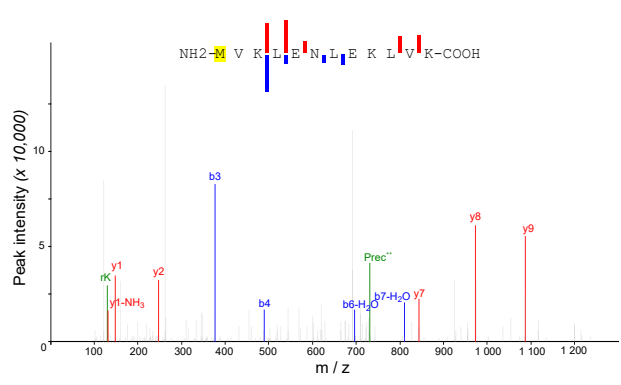

C

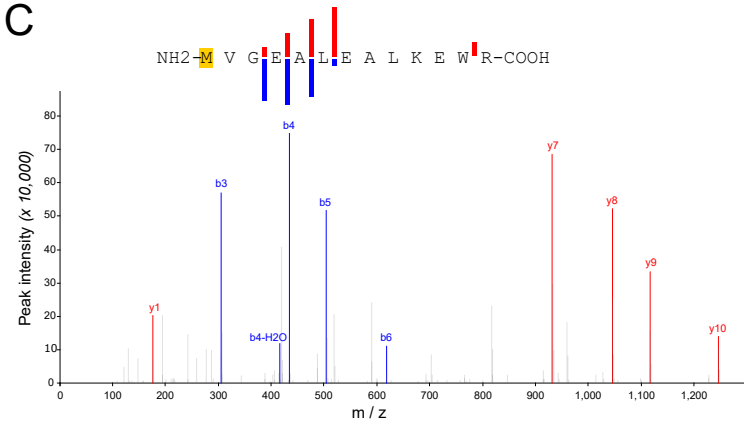

D

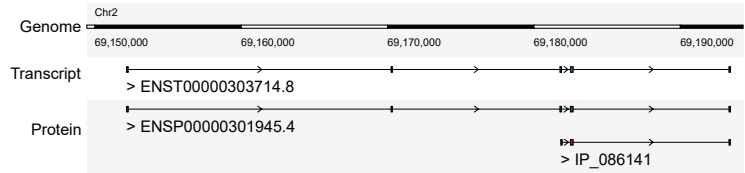

E

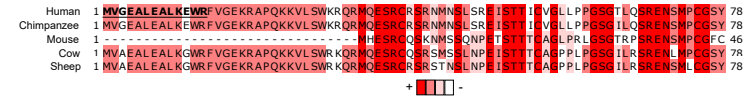

Supplement: mmc6.pdf [file mmc6.pdf]
